# Supplementary material for: Whole-brain opto-fMRI map of mouse VTA dopaminergic activation reflects structural projections with small but significant deviations
Source: PubMed Central journal article supplement (PMC8844000; doi:10.1038/s41398-022-01812-5), 2022-02-14
Supplement: 41398_2022_1812_MOESM1_ESM.pdf [file 41398_2022_1812_MOESM1_ESM.pdf]

## Supplementary Materials

| Onset [s] | Duration [s] | Frequency [Hz] | Pulse Width [s] |
|-----------|--------------|----------------|-----------------|
| 182.0     | 20.0         | 20.0           | 0.005           |
| 332.0     | 20.0         | 20.0           | 0.005           |
| 482.0     | 20.0         | 20.0           | 0.005           |
| 632.0     | 20.0         | 20.0           | 0.005           |
| 782.0     | 20.0         | 20.0           | 0.005           |
| 932.0     | 20.0         | 20.0           | 0.005           |
| 1082.0    | 20.0         | 20.0           | 0.005           |
| 1232.0    | 20.0         | 20.0           | 0.005           |

**Table S1:** Block stimulation protocol, coded "CogB".

| Onset [s] | Duration [s] | Frequency [Hz] | Pulse Width [s] |
|-----------|--------------|----------------|-----------------|
| 180.0     | 20.0         | 20.0           | 0.005           |
| 310.0     | 20.0         | 20.0           | 0.005           |
| 480.0     | 20.0         | 20.0           | 0.005           |
| 630.0     | 20.0         | 20.0           | 0.005           |
| 780.0     | 20.0         | 20.0           | 0.005           |
| 930.0     | 20.0         | 20.0           | 0.005           |
| 1080.0    | 20.0         | 20.0           | 0.005           |
| 1230.0    | 20.0         | 20.0           | 0.005           |

**Table S2:** Block stimulation protocol, coded "CogBr".

| Onset [s] | Duration [s] | Frequency [Hz] | Pulse Width [s] |
|-----------|--------------|----------------|-----------------|
| 192.0     | 30.0         | 20.0           | 0.005           |
| 342.0     | 30.0         | 20.0           | 0.005           |
| 492.0     | 30.0         | 20.0           | 0.005           |
| 642.0     | 30.0         | 20.0           | 0.005           |
| 792.0     | 30.0         | 20.0           | 0.005           |
| 942.0     | 30.0         | 20.0           | 0.005           |
| 1092.0    | 30.0         | 20.0           | 0.005           |
| 1242.0    | 30.0         | 20.0           | 0.005           |

**Table S3:** Block stimulation protocol, coded "CogBl".

| Onset [s] | Duration [s] | Frequency [Hz] | Pulse Width [s] |
|-----------|--------------|----------------|-----------------|
| 180.0     | 8.0          | 20.0           | 0.005           |
| 330.0     | 10.0         | 20.0           | 0.005           |
| 480.0     | 12.0         | 20.0           | 0.005           |
| 630.0     | 14.0         | 20.0           | 0.005           |
| 780.0     | 16.0         | 20.0           | 0.005           |
| 930.0     | 28.0         | 20.0           | 0.005           |
| 1080.0    | 20.0         | 20.0           | 0.005           |
| 1230.0    | 22.0         | 20.0           | 0.005           |

**Table S4:** Block stimulation protocol, coded "CogBm".

| Onset [s] | Duration [s] | Frequency [Hz] | Pulse Width [s] |
|-----------|--------------|----------------|-----------------|
| 150.0000  | 20.0         | 15.0           | 0.005           |
| 280.0000  | 20.0         | 25.0           | 0.005           |
| 410.0000  | 20.0         | 15.0           | 0.010           |
| 540.0000  | 20.0         | 25.0           | 0.010           |
| 670.0000  | 20.0         | 15.0           | 0.005           |
| 799.9999  | 20.0         | 25.0           | 0.005           |
| 930.0000  | 20.0         | 15.0           | 0.010           |
| 1060.0000 | 20.0         | 25.0           | 0.010           |
| 1190.0000 | 20.0         | 15.0           | 0.005           |
| 1320.0000 | 20.0         | 25.0           | 0.005           |
| 1450.0000 | 20.0         | 15.0           | 0.010           |
| 1580.0000 | 20.0         | 25.0           | 0.010           |

**Table S5:** Block stimulation protocol, coded "CogMwf".

| Onset [s] | Duration [s] | Frequency [Hz] | Pulse Width [s] |
|-----------|--------------|----------------|-----------------|
| 190.0     | 0.8          | 25.0           | 0.005           |
| 192.0     | 0.8          | 25.0           | 0.005           |
| 194.0     | 0.8          | 25.0           | 0.005           |
| 196.0     | 0.8          | 25.0           | 0.005           |
| 290.0     | 0.8          | 25.0           | 0.005           |
| 292.0     | 0.8          | 25.0           | 0.005           |
| 294.0     | 0.8          | 25.0           | 0.005           |
| 296.0     | 0.8          | 25.0           | 0.005           |
| 390.0     | 0.8          | 25.0           | 0.005           |
| 392.0     | 0.8          | 25.0           | 0.005           |
| 394.0     | 0.8          | 25.0           | 0.005           |
| 396.0     | 0.8          | 25.0           | 0.005           |
| 490.0     | 0.8          | 25.0           | 0.005           |
| 492.0     | 0.8          | 25.0           | 0.005           |
| 494.0     | 0.8          | 25.0           | 0.005           |
| 496.0     | 0.8          | 25.0           | 0.005           |
| 590.0     | 0.8          | 25.0           | 0.005           |
| 592.0     | 0.8          | 25.0           | 0.005           |
| 594.0     | 0.8          | 25.0           | 0.005           |
| 596.0     | 0.8          | 25.0           | 0.005           |

**Table S6:** Phasic stimulation protocol, coded "CogP".

| Onset [s] | Duration [s] | Frequency [Hz] | Pulse Width [s] |
|-----------|--------------|----------------|-----------------|
| 50.0      | 1.0          | 20.0           | 0.005           |
| 90.0      | 1.0          | 20.0           | 0.005           |
| 130.0     | 1.0          | 20.0           | 0.005           |
| 170.0     | 1.0          | 20.0           | 0.005           |
| 210.0     | 1.0          | 20.0           | 0.005           |
| 250.0     | 1.0          | 20.0           | 0.005           |
| 290.0     | 1.0          | 20.0           | 0.005           |
| 330.0     | 1.0          | 20.0           | 0.005           |
| 370.0     | 1.0          | 20.0           | 0.005           |
| 410.0     | 1.0          | 20.0           | 0.005           |
| 450.0     | 1.0          | 20.0           | 0.005           |
| 490.0     | 1.0          | 20.0           | 0.005           |
| 530.0     | 1.0          | 20.0           | 0.005           |
| 570.0     | 1.0          | 20.0           | 0.005           |
| 610.0     | 1.0          | 20.0           | 0.005           |

**Table S7:** Phasic stimulation protocol, coded "JPogP".

In a linear modelling of the implant coordinate variables, the VTA mean t statistic is found sensitive only to the stimulation protocol category ( $F_{1,59} = 57.3$ ,  $p = 2.92 \times 10^{-10}$ ), but not the stimulation target depth ( $F_{1,59} = 0.48$ ,  $p = 0.49$ ), the stimulation target posteroanterior (PA) coordinates ( $F_{1,59} = 0.59$ ,  $p = 0.45$ ), and the interaction of the depth and PA target coordinates ( $F_{1,59} = 0.48$ ,  $p = 0.49$ ).

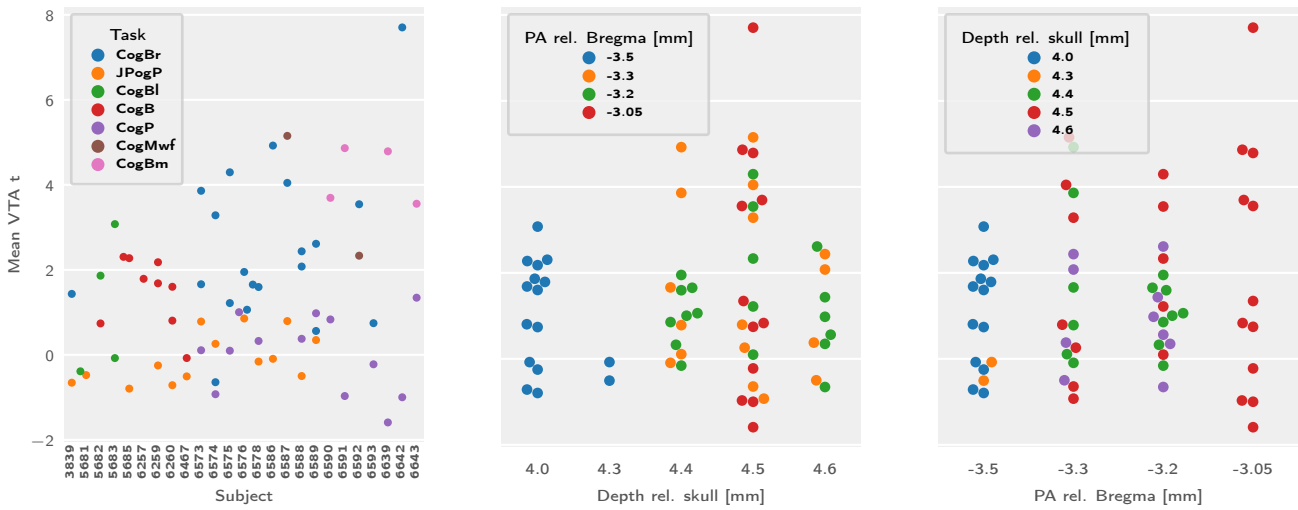

**Figure S1:** Multifactorial (depth and posteroanterior) implant coordinate comparisons of signal intensity in the VTA region of interest. Protocols coded as in tables S1 to S7.

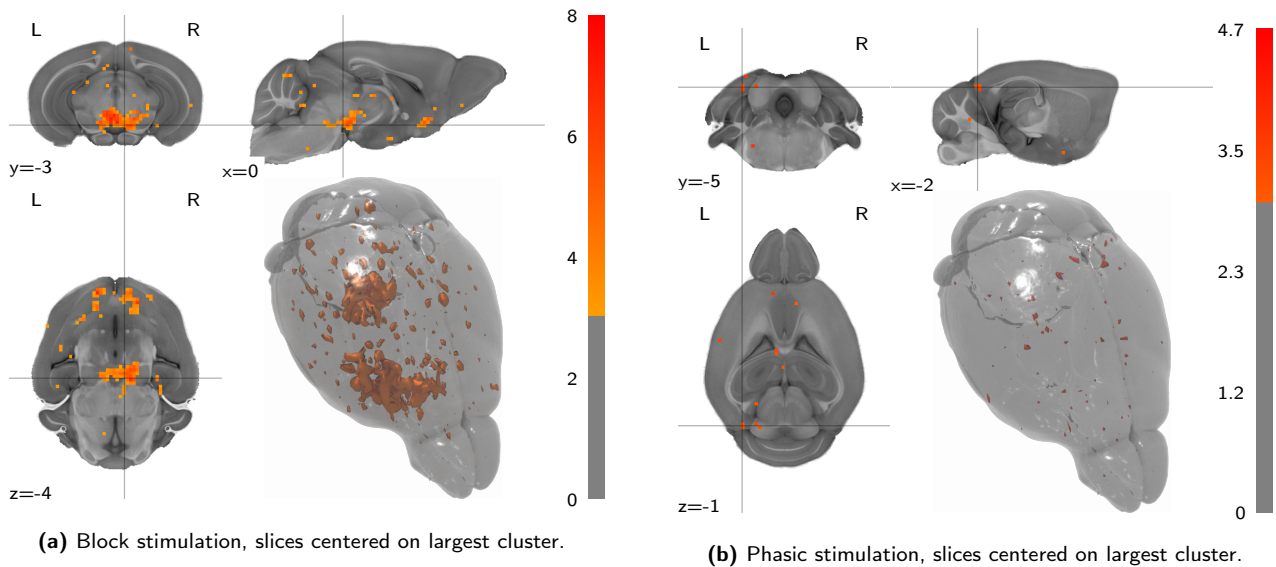

**Figure S2:** No negative activation patterns are salient upon block VTA stimulation, and no coherent activation patterns of any sort after phasic VTA stimulation. Depicted are t-statistic maps (thresholded at  $|t| \geq 3$ ) of second-level analyses, divided by stimulation category and binning all implant coordinates. Slices are centered on the VTA coordinates (RAS = 0.5/ -3.2/ -4.5) and the largest cluster, respectively. All maps are adjusted for the wild type control stimulation effects.

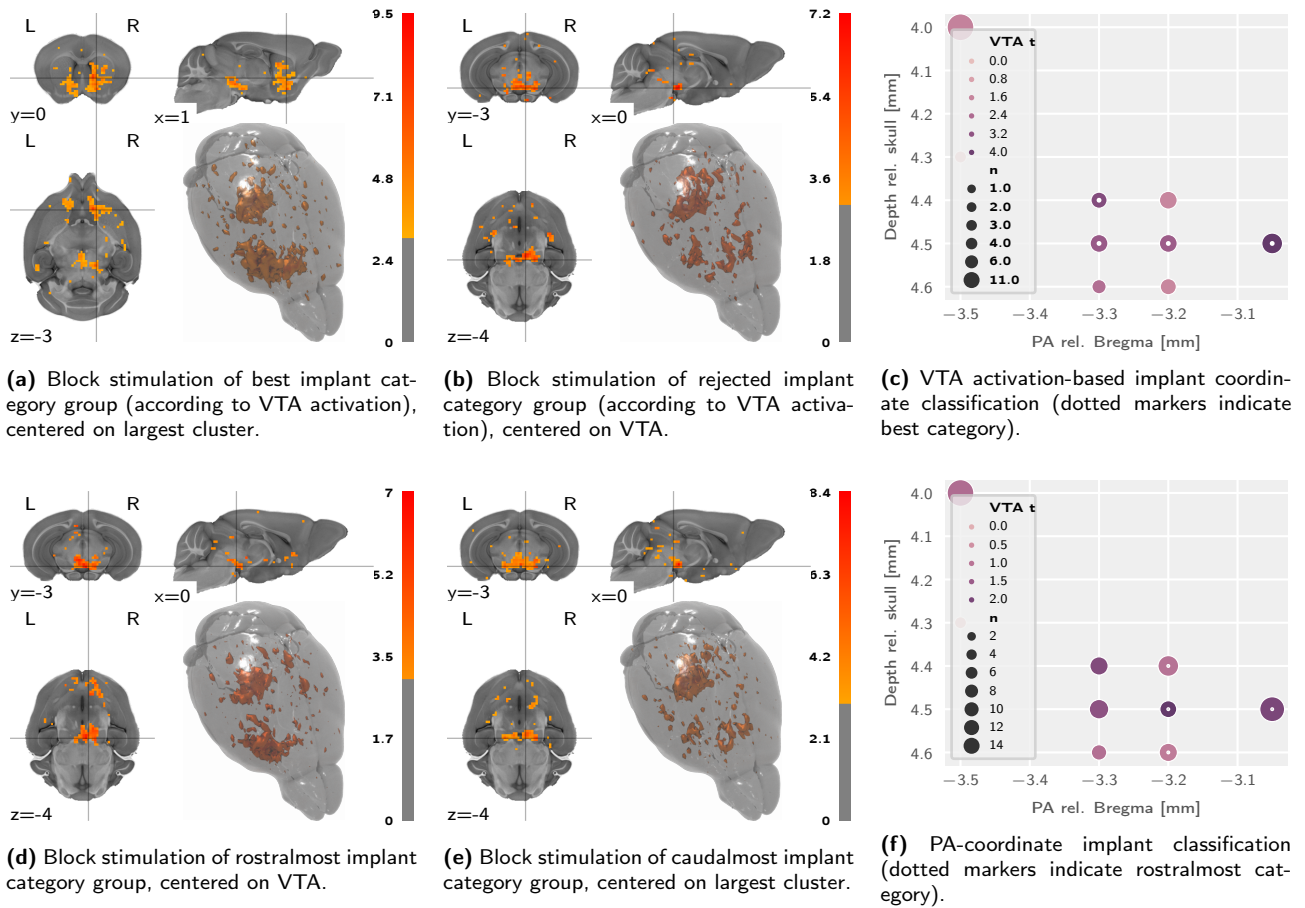

**Figure S3: PA-coordinate-based classification does not show a better projection segmentation than block trial-based classification.** Depicted are t-statistic maps (centered on largest cluster, thresholded at  $t \geq 3$ ) of the second-level analysis for block stimulation protocols, divided into best and rejected (**a, b**), or rostralmost and caudalmost (**d, e**). All maps are adjusted for the wild type control stimulation effects.

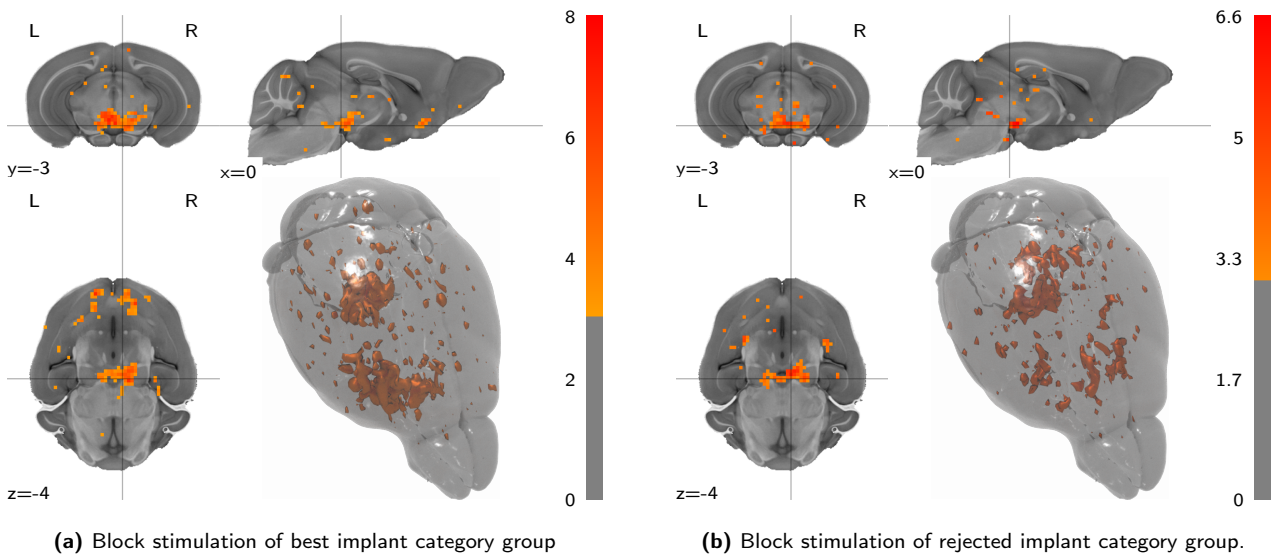

**Figure S4: The uncorrected population-level response to block stimulation does not qualitatively differ from the wild type control corrected results in figs. 3a and 3c.** Depicted are wildtype-control-uncorrected t-statistic maps (thresholded at  $t \geq 3$ ) of the second-level analysis for block stimulation protocols, divided by implant category group. Slices are centered on the VTA region of interest.

Whole-Brain opto-fMRI Map of Mouse VTA Dopaminergic Activation Reflects Structural Projections with Small but Significant Deviations

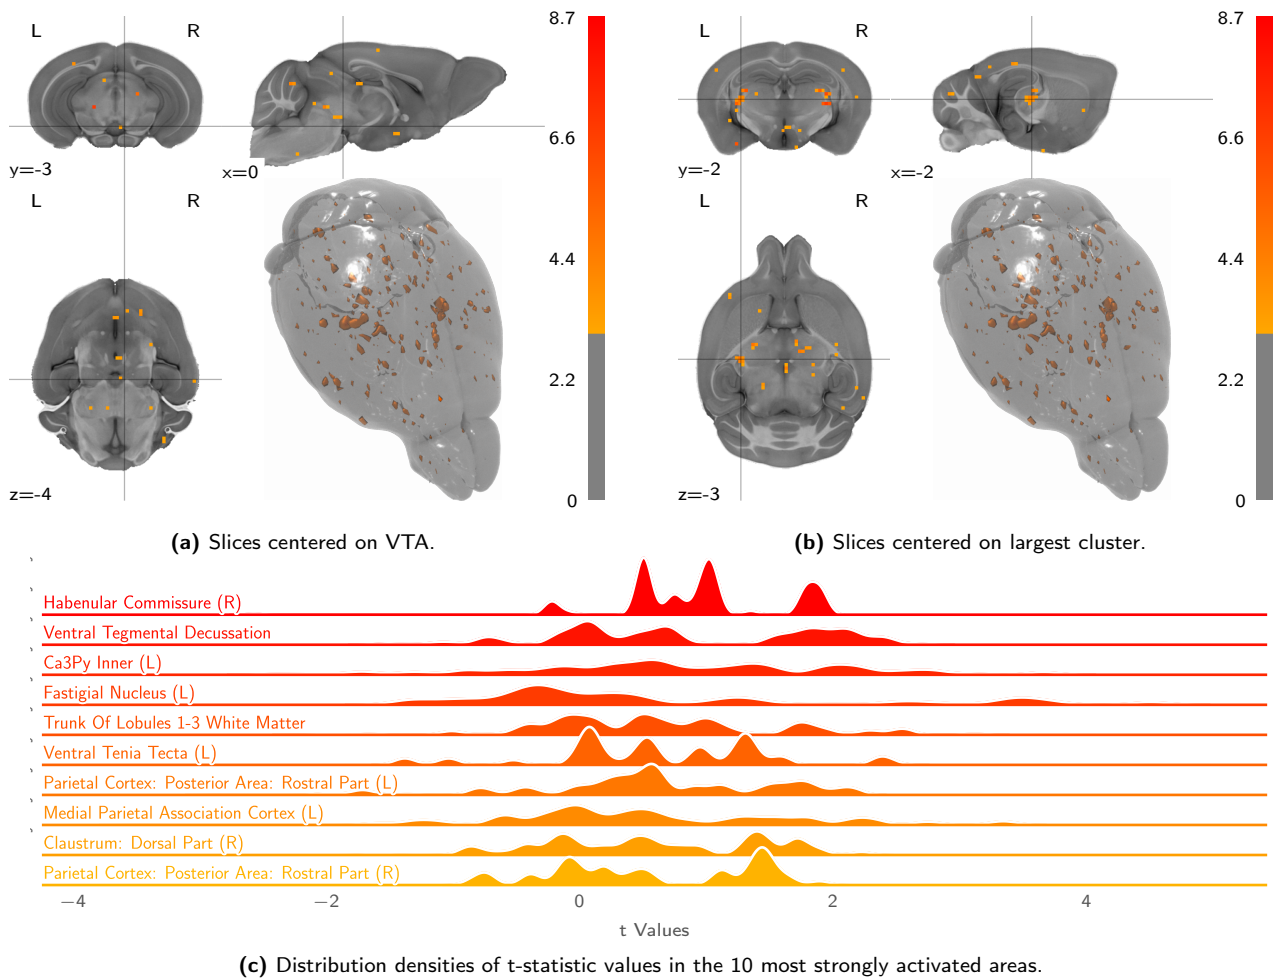

**Figure S5: Block stimulation in wild type control animals produces no large activation clusters, yet scattered activation hints at some visual excitation and heating artefacts.** Depicted are volumetric population t-statistic maps (a, b) — thresholded at  $t \geq 3$ , as well as a break-down of activation along atlas parcellation regions (c).

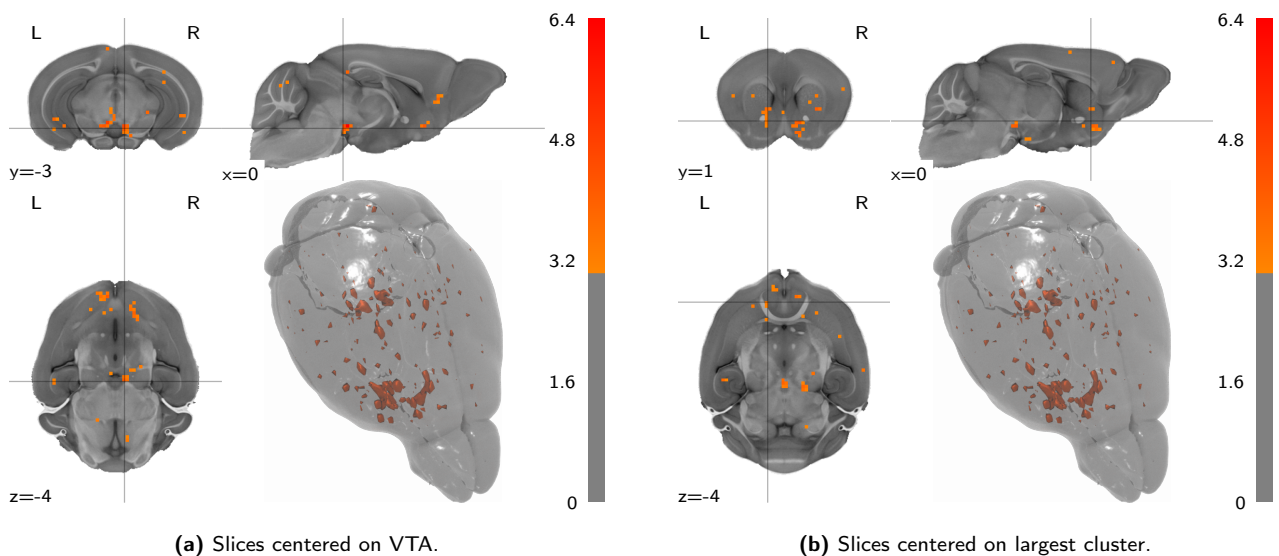

**Figure S6:** Depicted are t-statistic maps (thresholded at  $t \geq 3$ ) of the second-level analysis for block stimulation task VTA seed functional connectivity, observed in the best implant category, corrected for the negative control baseline. Slices are centered on the VTA coordinates (RAS = 0.5/ - 3.2/ - 4.5) and the largest cluster, respectively. This comparison is only provided for the sake of completeness and analogy with the stimulus-evoked analysis. Conceptually this comparison is not of primary interest, since seed-based functional connectivity attempts to include precisely the baseline functioning of the system into the evaluation.

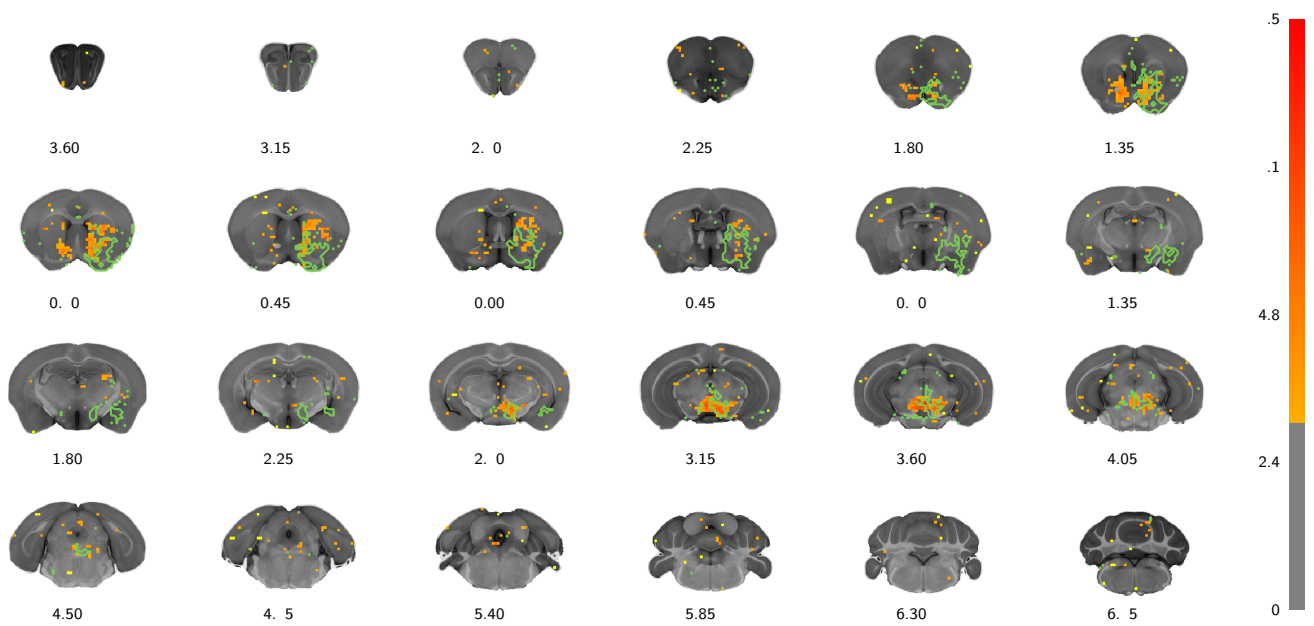

**Figure S7:** Coronal slice overlay, showing the VTA functional activation t-statistic heatmap (as in **fig. 3a**), and the VTA structural projection outline, both thresholded at  $t \geq 3$ . Interpretation of this figure as showcasing a complementarity in the patterns is cautioned, as qualitative inspection of thresholded data does not accurately capture variation in the statistic distributions. For statements regarding the comparison of functional activation and structural projection, **figs. 4a to 4c** are more suitable.
